# Supplementary material for: Genetic Characterization of Plasmodium Putative Pantothenate Kinase Genes Reveals Their Essential Role in Malaria Parasite Transmission to the Mosquito
Source: PubMed Central journal article supplement (PMC5028760; doi:10.1038/srep33518), 2016-09-20
Supplement: srep33518-s1.pdf [file srep33518-s1.pdf]

**Supplementary Online Information:**

**Genetic Characterization of *Plasmodium* Putative Pantothenate Kinase Genes Reveals Their Essential Role in Malaria Parasite Transmission to the Mosquito.**

Robert J. Hart<sup>1</sup>, Emmanuel Cornillot<sup>2</sup>, Amanah Abraham<sup>1</sup>, Emily Molina<sup>1</sup>, Catherine S. Nation<sup>1</sup>, Choukri Ben Mamoun<sup>3</sup> and Ahmed S. I. Aly\*<sup>1</sup>.

<sup>1</sup> Tulane University, Department of Tropical Medicine, New Orleans, LA 70112, USA.

<sup>2</sup> Institut de Biologie Computationnelle, Université Montpellier, 34095 Montpellier, France.

<sup>3</sup> Yale University School of Medicine, Section of Infectious Diseases, New Haven, CT 06520, USA.

\*To whom correspondence should be addressed:

**Ahmed S. I. Aly**, Tulane University, Department of Tropical Medicine, New Orleans, USA.

Email: [aaly@tulane.edu](mailto:aaly@tulane.edu)

## **Supplementary Table 1**

### **Primer sequences (5'-3')**

39: AGTATGGCATTTCATAAATCTTTGGCTGTAGTA;  
40: ACTATTGTTTCATTATTATTATCAATTATACTT;  
41: GGCCGCGGATGATAAACCATATTTTGAAGAAATTATTAGTGA;  
42: TCCGGATCCGCTTATTCTGGATTTTCAAATGAATAGTTAATAA;  
43: GCCCAAGCTTCTTTAAGAAATTATGAACAATTCAAGCAATCCAA;  
44: TCCGGTACCTTCCTAATATATATGATTTATAAATTAATTTGAT;  
45: GAAGATTTTATCATTATTCGAGTCAGAGTACATCA;  
46: ACACGAACCCAAAGAAATCGGCAAGCTAAAATA;  
47: ATTATATGGATGTGATTTTTTCAGGTAATTCTAA;  
48: CATACTCAAATATCTTTTTAGTAGTTCCTCAATA;  
51: GGCCGCGGGAATAATAAAAATCTTTTACACTATTATATCTGCT;  
52: TCCGGATCCTTCCAATTAATCGATATATTTTTACTAATCAT;  
53: TGCCAAGCTTTTTTAAATATGTAAATAGTAAAATAAAGAATATATG;  
54: TCCGGTACCGTTAATGACATTGGTACGTGTGTGTATACTATTTT;  
55: ACATTATTAATAATAATAGGTCATAAAAATAAAGG;  
56: TCTAAACAAAATATCAACTTTTTTTGTTGTTTCCT;  
57: GGCCGCGGAGCACAAATACCAATACAAATCAAATCACCCTT;  
58: TCCGAATTCAGAAAAAAACCTCCGATAACTCCTAAAAATCC;  
61: GGCCGCGGTGGGGCAAGACAAATATAAAAACCTTTAAAACCCAT;  
62: TCCGGATCCAAAGGAGCATTATACTCCTATGATATTCCCCAT;  
63: TGCCAAGCTTTTTTTGAAACACTTTTTTTTTTAAGTTATATTTG;  
64: TCCGGTACCTTGACAACAAATATTATTTTTAATTTGAAAACG;  
65: TGTAGTTAAGTGATCATATATAGTAACTGAGTT;  
66: TGAAGCTCTATATATTTTGACTAAATACGAAATT;  
67: GCAAAGTAAAGATGGTGAATTTTCATTAACGAA;  
68: TCAATAAAAAAAGGGATATAACTGATTTATACCC;  
16: ATGTCCATTAACATCACCATCTAATTCAACAAG;  
17: GTGTTCTTTCTGATGTTCAAGAAGAAAAAGGTA;  
real18S-F: GCGGCGAGTACGCTATATCC;  
real18S-R: CATGTCTGAAGATGCGAGAAA;  
realPank1-F: GTAGATATGTCTTTATAAACTTGAGG;  
realPank1-R: AGAACTTCGGGGTATTGTATCATCT;  
realPank2-F: CTTTGATATGTCTGTTGGCGATATT;  
realPank2-R: ATTCATAGCTGACCCGAAACA;  
realPAT-F: GTCCGCTTTAGGAGGAGTATTAG;  
realPAT-R: ACGGTA CTACCAAACATAGC;  
realPPCS-F: TGGATAATATATTGGGCGAACT;  
realPPCS-R: CCTCCAGAGGTGACCAA;  
realPPCDC-F: CGAGGTGATGATATCTTGCATATAGA;  
realPPCDC-R: TCCAACAACGACAAATAGAGGT;  
realPPAT-F: TGCCCTTGATATTGAGATATGTT;  
realPPAT-R: GTGTTGATTTGTTGCTCTTAAT;  
realDPCK-F: CATCAGTTCGGTAGTGGTGAA;  
realDPCK-R: ACCTACAGCTATACCTCCTGTAA;  
rtEXP1-F: AACAAAGTATGGTAAAAATGGCAAATATGGCTCC;  
rtEXP1-R: GTTTTGAACATTTGGGGTGTTAGATGGTGCAGG;  
rt18S-F: GCGGCTTAATTTGACTCAACACGGGGAACTCA;  
rt18S-R: CCGCAAAAGAGCAAAAGGTAACCAATTGATTA;  
rtDHFR-F: GTAAGAATATGGGAAGCTAATGGAACAAGAGAA;  
rtDHFR-R: AGCATTACCAATACATGTATAAATTCAGCTGG.

### Supplementary Figure 1

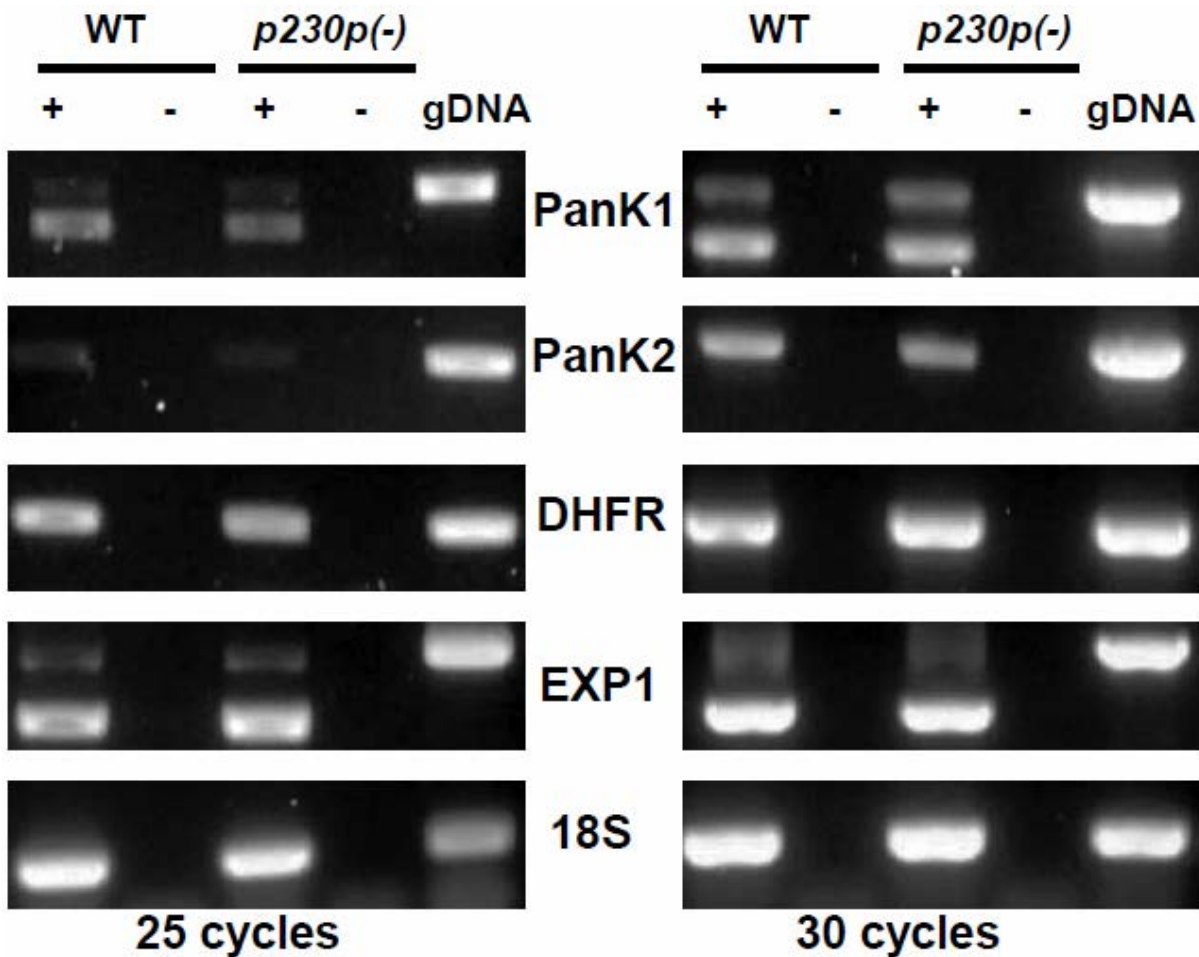

**Supplement. Figure1:** Similar transcription levels of *PanK1*, *PanK2* and different unrelated genes (*18S*, *EXP1* and *DHFR/TS*) during the blood stage cycle of *P. yoelii* 17XNL WT strain compared to *Pyp230p(-)* control WT-like strain. RT-PCR analysis of total RNA isolated from blood stage parasites of 17XNL WT and *Pyp230p(-)* strains (with similar infected blood parasitemia of ~1%) was performed using the primer pairs listed in Supplementary Table1. Control RT-PCR reactions on RNA in the absence of reverse transcription (-) and on genomic DNA were also performed. Similar amounts of RNA of 60 ng was used for each RT +/- reaction, while 20 ng of WT gDNA was used for each genomic PCR reaction.
